# Supplementary material for: Unravelling the role of alkaline earth metal carbonates in intermediate temperature CO2 capture using alkali metal salt-promoted MgO-based sorbents
Source: Royal Society of Chemistry journal article supplement (doi:10.1039/d0ta06170k), 2020-01-01
Supplement: d0ta06170k1.pdf [file d0ta06170k1.pdf]

## Electronic Supplementary Information

### **Unravelling the Role of Alkaline Earth Metal Carbonate in Intermediate Temperature CO<sub>2</sub> Capture by Alkali Metal Salt-Promoted MgO-Based Sorbents**

Hongjie Cui, Zhenmin Cheng, and Zhiming Zhou\*

*School of Chemical Engineering,*

*East China University of Science and Technology*

*Shanghai 200237, China*

\* Corresponding Author

*Phone:* +86 21 6425 2230; *Fax:* +86 21 6425 3528; *Email:* zmzhou@ecust.edu.cn

**Table S1** Estimated kinetic parameters for the AMS-promoted  $\text{AeCO}_3$ -doped MgO-based sorbents

| Sorbents                              | $T$ [°C] | $k_1$ [ $\text{min}^{-1}$ ] | $k_2$ [ $\text{min}^{-1}$ ] | $R^2$ |
|---------------------------------------|----------|-----------------------------|-----------------------------|-------|
| AMS-Mg <sub>100</sub>                 | 260      | 0.148                       | 0.017                       | 0.990 |
|                                       | 280      | 0.221                       | 0.023                       | 0.973 |
|                                       | 300      | 0.305                       | 0.039                       | 0.985 |
|                                       | 320      | 0.380                       | 0.073                       | 0.980 |
| AMS-Mg <sub>90</sub> Ca <sub>10</sub> | 260      | 0.216                       | 0.013                       | 0.972 |
|                                       | 280      | 0.317                       | 0.022                       | 0.984 |
|                                       | 300      | 0.377                       | 0.036                       | 0.985 |
|                                       | 320      | 0.465                       | 0.057                       | 0.971 |
| AMS-Mg <sub>90</sub> Sr <sub>10</sub> | 260      | 0.153                       | 0.010                       | 0.986 |
|                                       | 280      | 0.259                       | 0.019                       | 0.967 |
|                                       | 300      | 0.312                       | 0.027                       | 0.987 |
|                                       | 320      | 0.394                       | 0.052                       | 0.997 |
| AMS-Mg <sub>90</sub> Ba <sub>10</sub> | 260      | 0.193                       | 0.010                       | 0.961 |
|                                       | 280      | 0.291                       | 0.014                       | 0.984 |
|                                       | 300      | 0.348                       | 0.027                       | 0.998 |
|                                       | 320      | 0.442                       | 0.049                       | 0.980 |

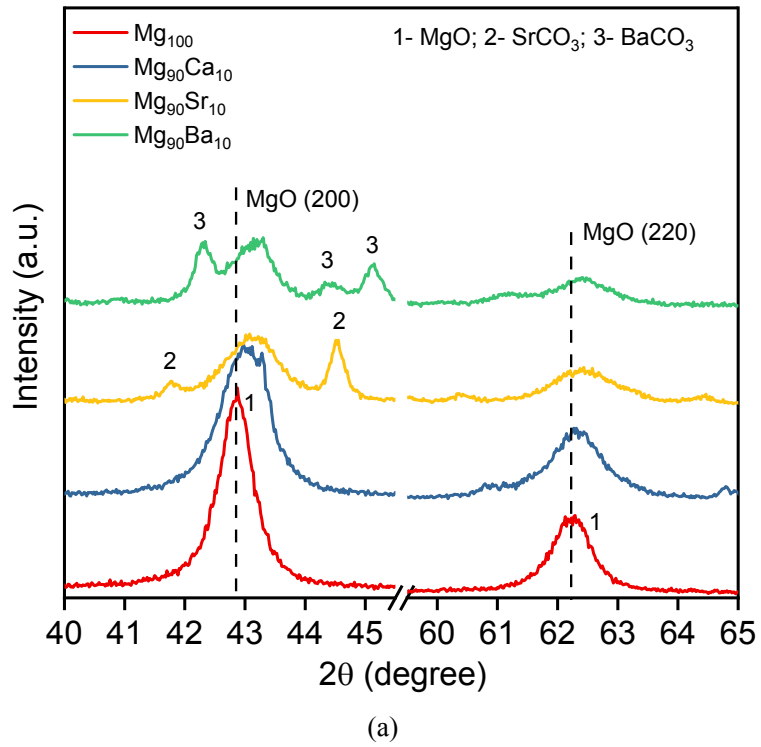

| Samples                           | Lattice parameter |
|-----------------------------------|-------------------|
|                                   | [nm]              |
| Mg <sub>100</sub>                 | 0.4224            |
| Mg <sub>90</sub> Ca <sub>10</sub> | 0.4218            |
| Mg <sub>90</sub> Sr <sub>10</sub> | 0.4214            |
| Mg <sub>90</sub> Ba <sub>10</sub> | 0.4213            |

(b)

**Fig. S1** (a) XRD patterns and (b) lattice parameters of AeCO<sub>3</sub>-doped MgO.

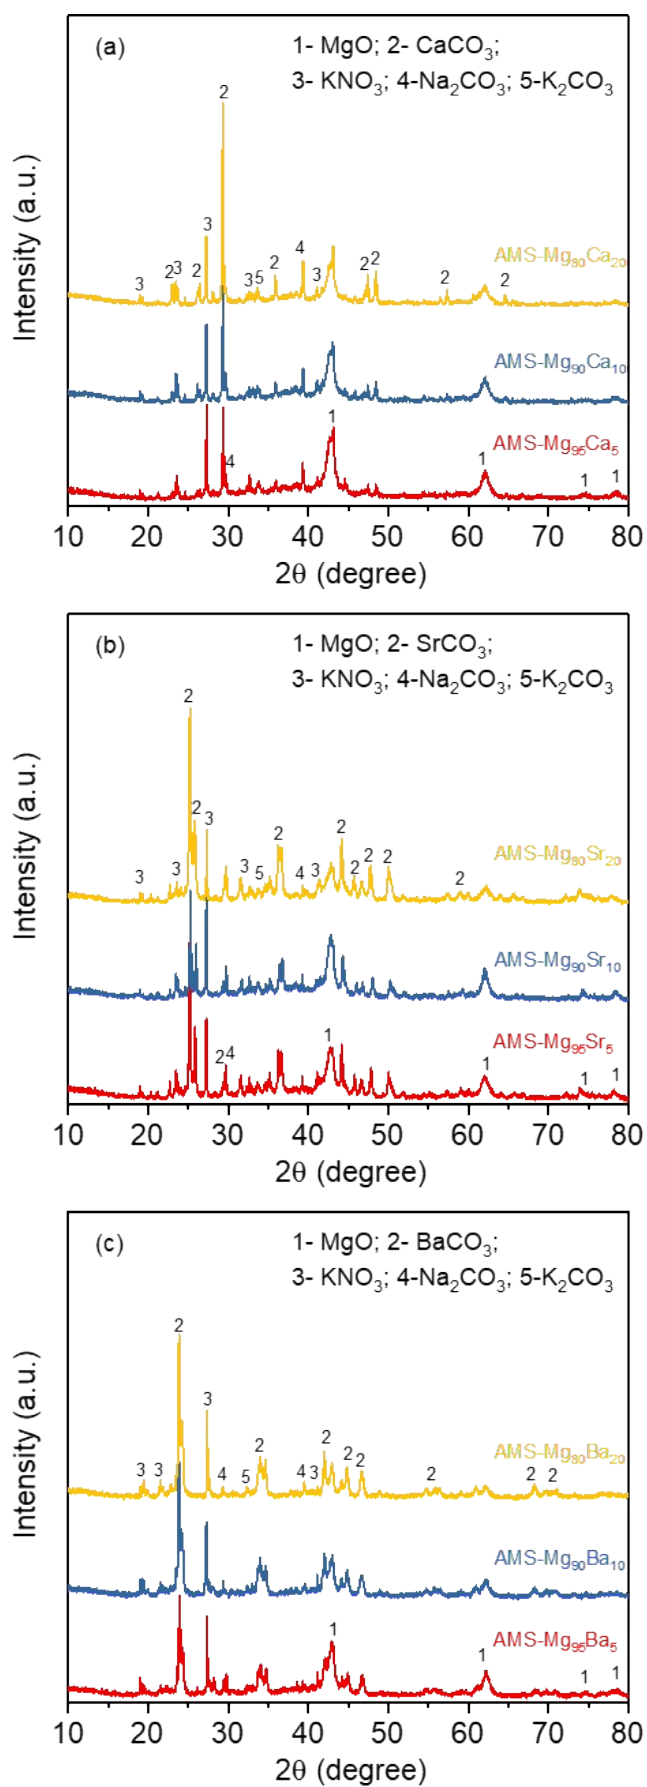

Fig. S2 XRD patterns of AMS-promoted MgO doped with (a) CaCO<sub>3</sub>, (b) SrCO<sub>3</sub> and (c) BaCO<sub>3</sub>.

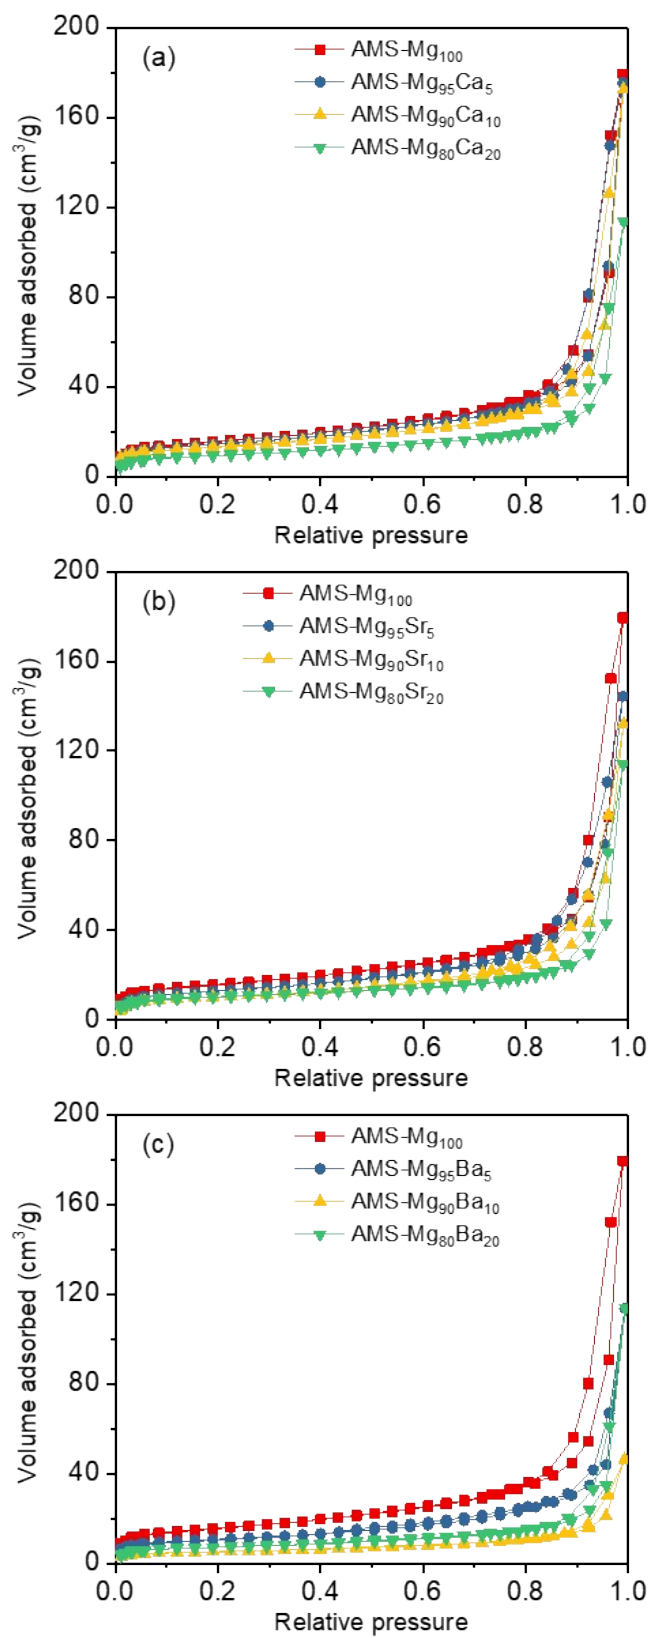

**Fig. S3** N<sub>2</sub> physisorption isotherms of AMS-promoted MgO doped with (a) CaCO<sub>3</sub>, (b) SrCO<sub>3</sub> and (c) BaCO<sub>3</sub>.

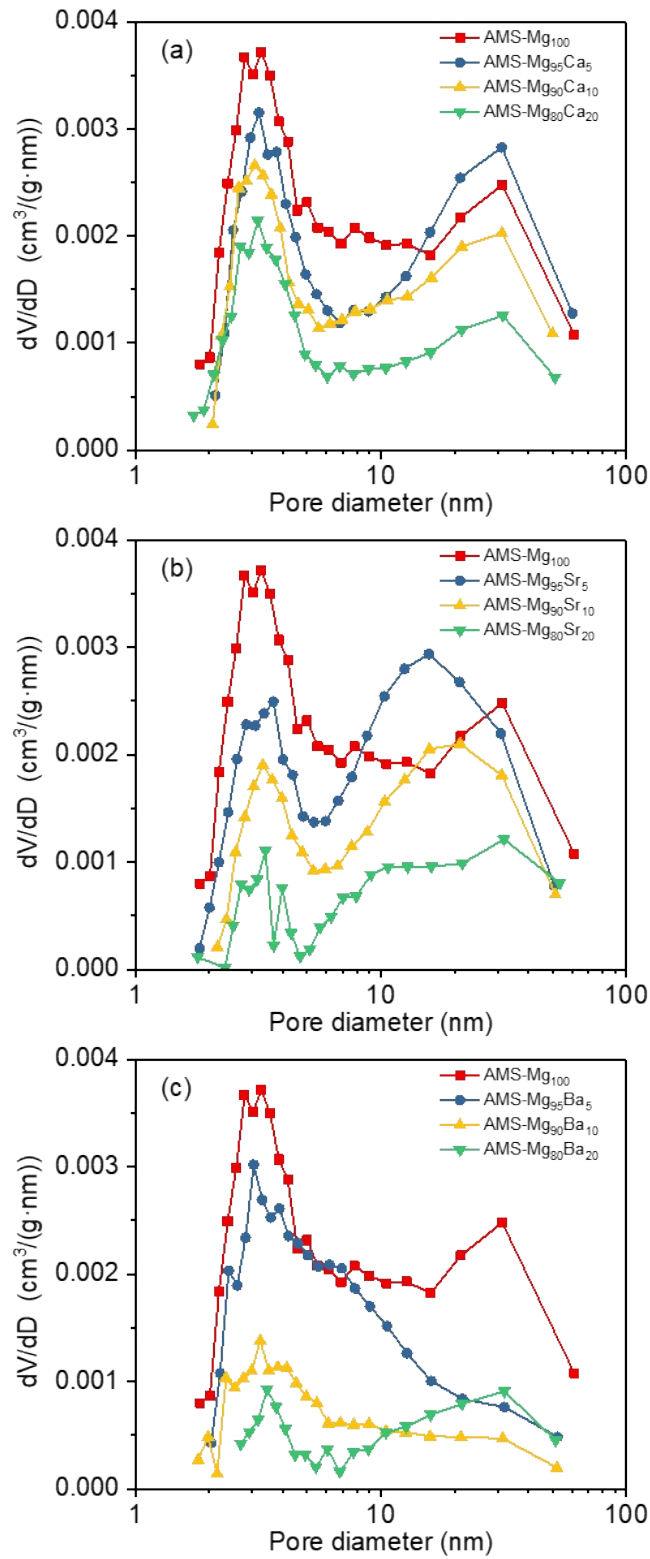

**Fig. S4** Pore size distribution curves of AMS-promoted MgO doped with (a)  $\text{CaCO}_3$ , (b)  $\text{SrCO}_3$  and (c)  $\text{BaCO}_3$ .

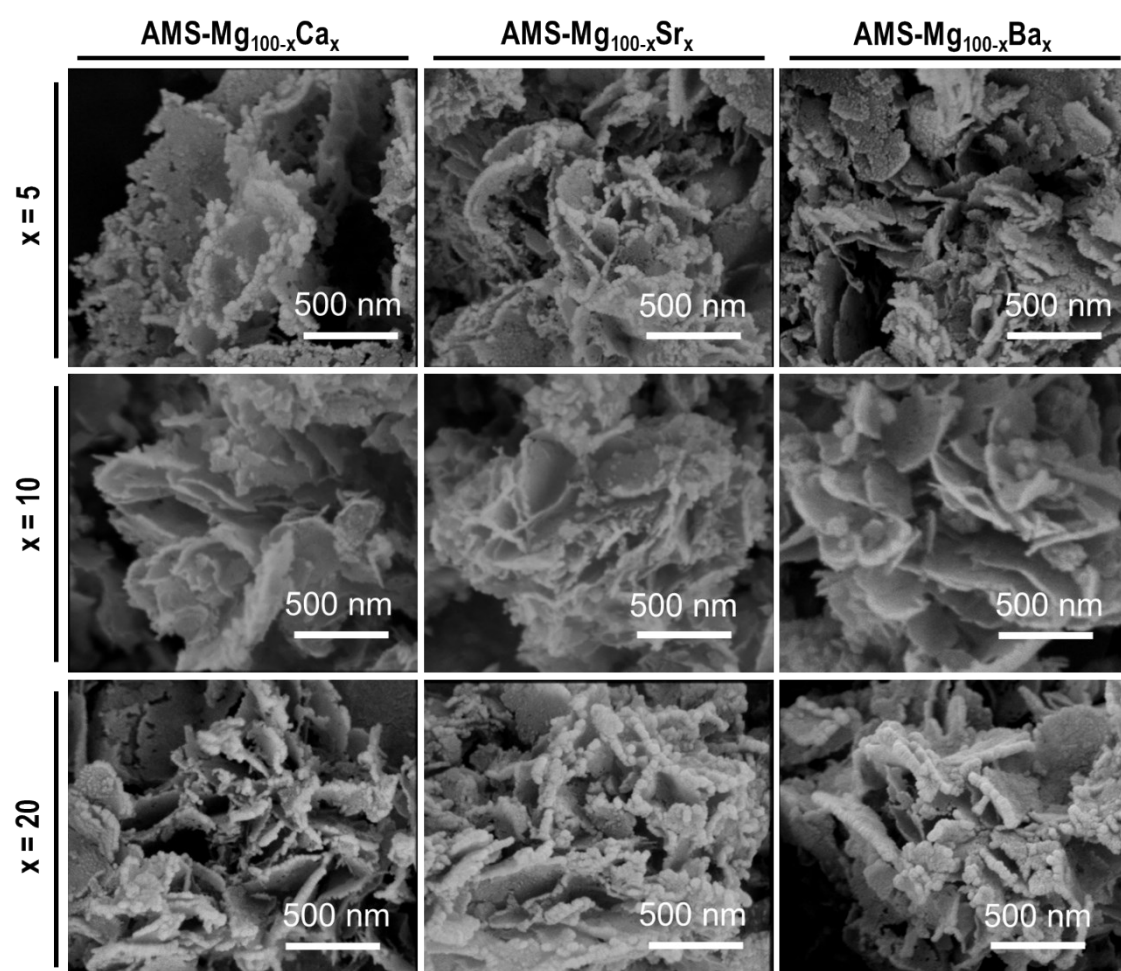

**Fig. S5** FESEM images of fresh AMS-promoted  $\text{AcCO}_3$ -doped MgO sorbents.

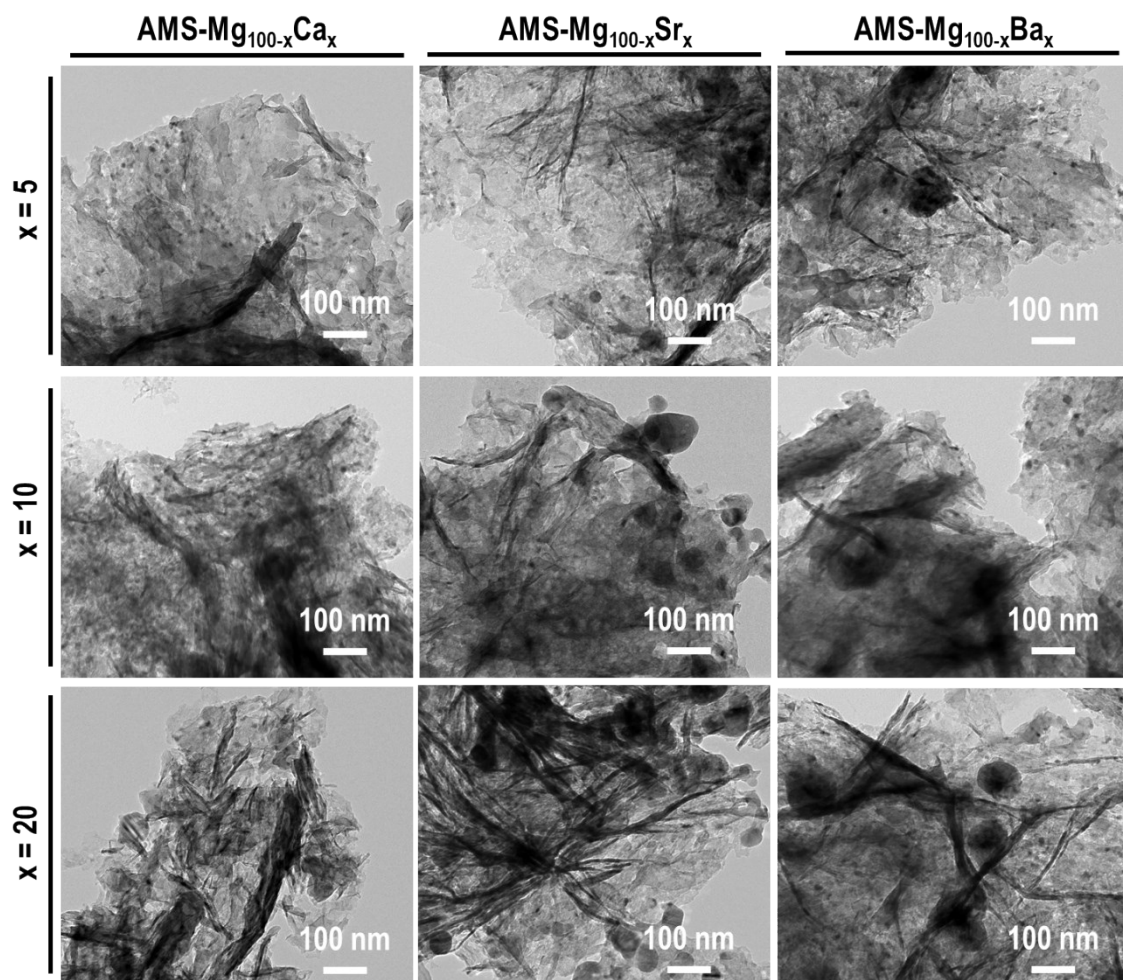

**Fig. S6** HRTEM images of fresh AMS-promoted  $\text{AcCO}_3$ -doped MgO sorbents.



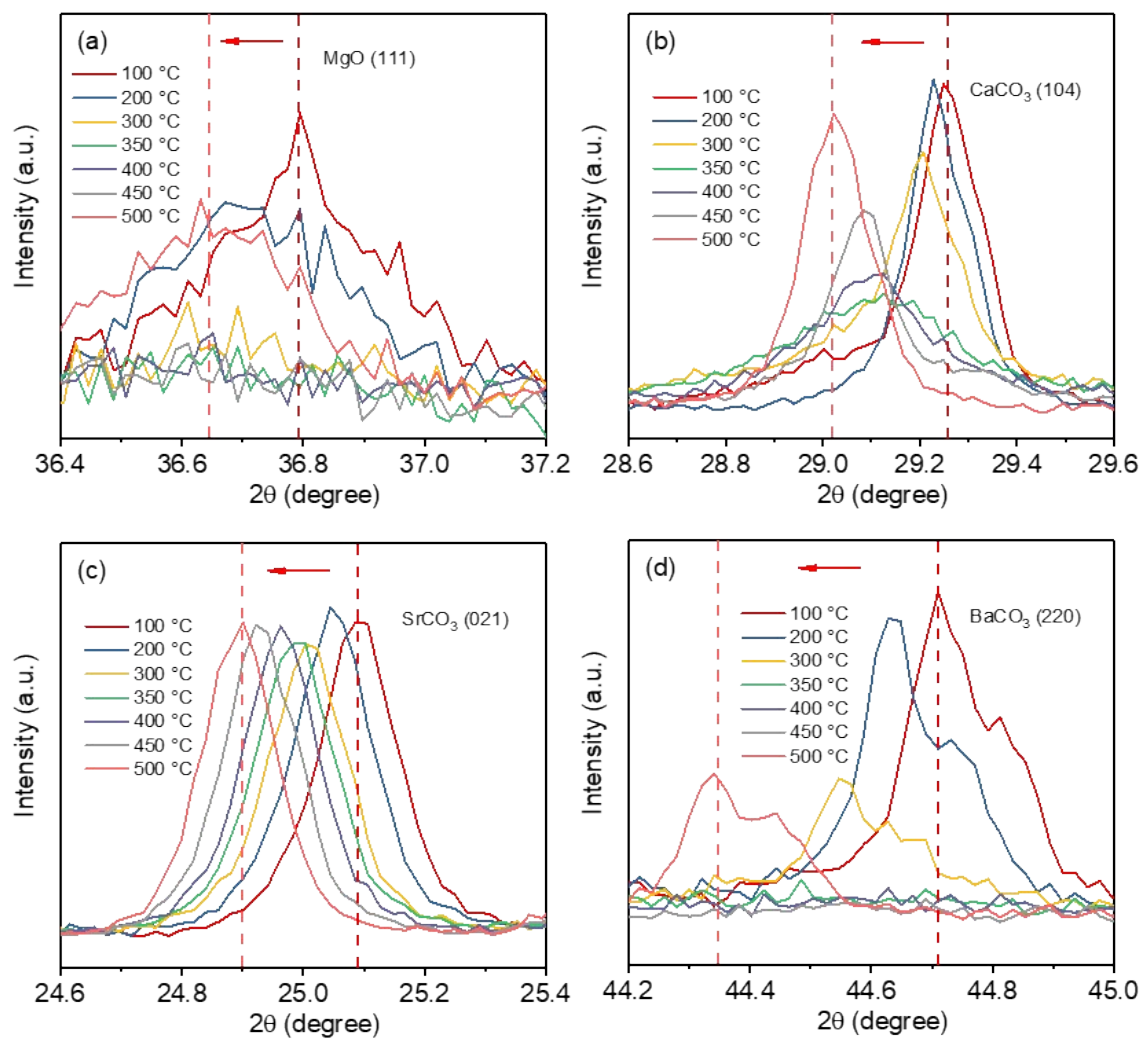

**Fig. S7** Diffractograms recorded by in-situ XRD analysis of (a) AMS-Mg<sub>100</sub>, (b) AMS-Mg<sub>90</sub>Ca<sub>10</sub>, (c) AMS-Mg<sub>90</sub>Sr<sub>10</sub> and (d) AMS-Mg<sub>90</sub>Ba<sub>10</sub> when heating from 100 to 500 °C in CO<sub>2</sub>.

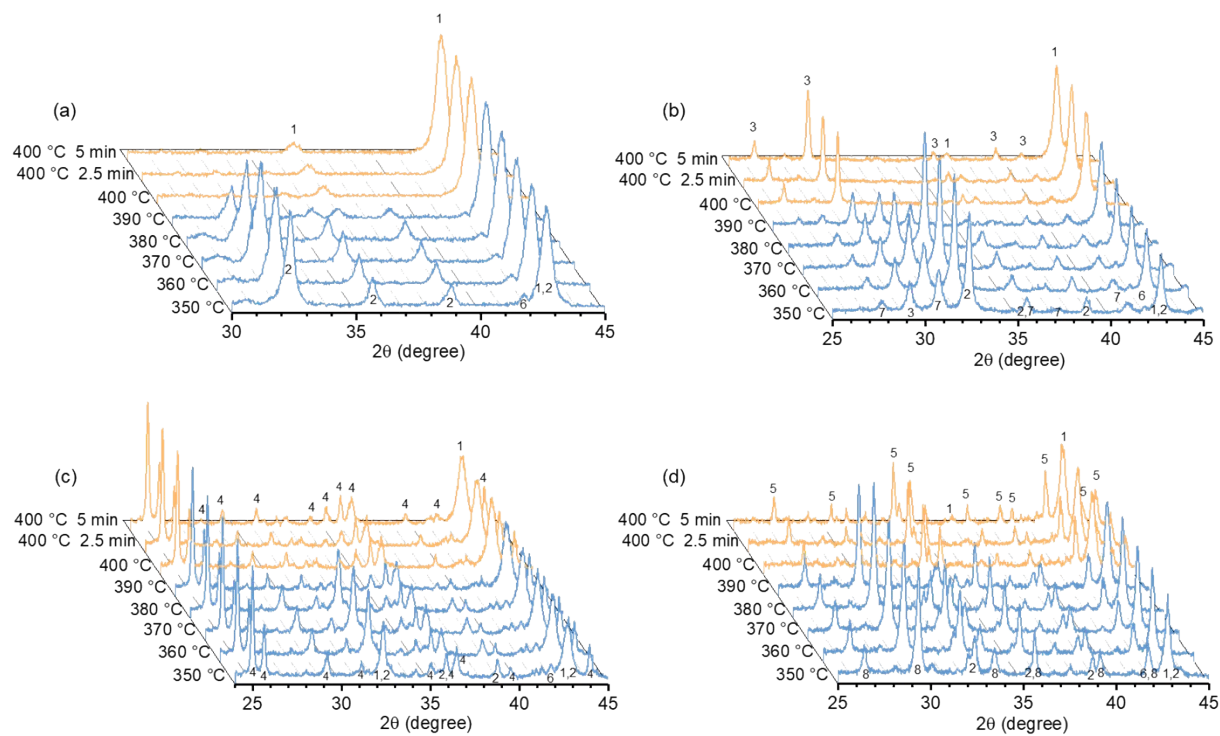

**Fig. S8** Diffractograms recorded by in-situ XRD analysis during regeneration of (a) AMS-Mg<sub>100</sub>, (b) AMS-Mg<sub>90</sub>Ca<sub>10</sub>, (c) AMS-Mg<sub>90</sub>Sr<sub>10</sub> and (d) AMS-Mg<sub>90</sub>Ba<sub>10</sub> from 350 to 400 °C in N<sub>2</sub>. (1-MgO; 2-MgCO<sub>3</sub>; 3-CaCO<sub>3</sub>; 4-SrCO<sub>3</sub>; 5-BaCO<sub>3</sub>; 6-K<sub>2</sub>Mg(CO<sub>3</sub>)<sub>2</sub>; 7-CaMg(CO<sub>3</sub>)<sub>2</sub>; 8-BaMg(CO<sub>3</sub>)<sub>2</sub>).

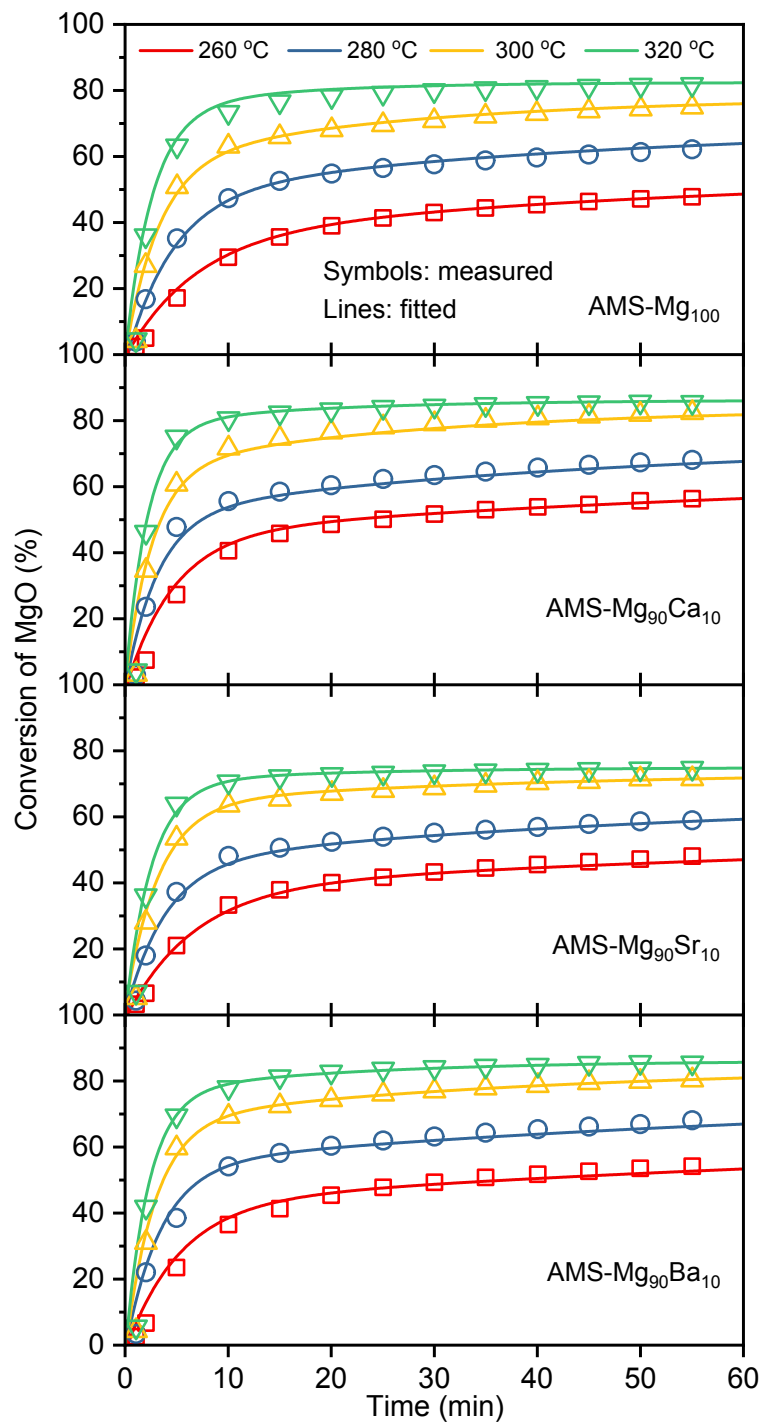

**Fig. S9** Measured and fitted CO<sub>2</sub> uptake of AMS-promoted AeCO<sub>3</sub>-doped MgO sorbents in CO<sub>2</sub>.

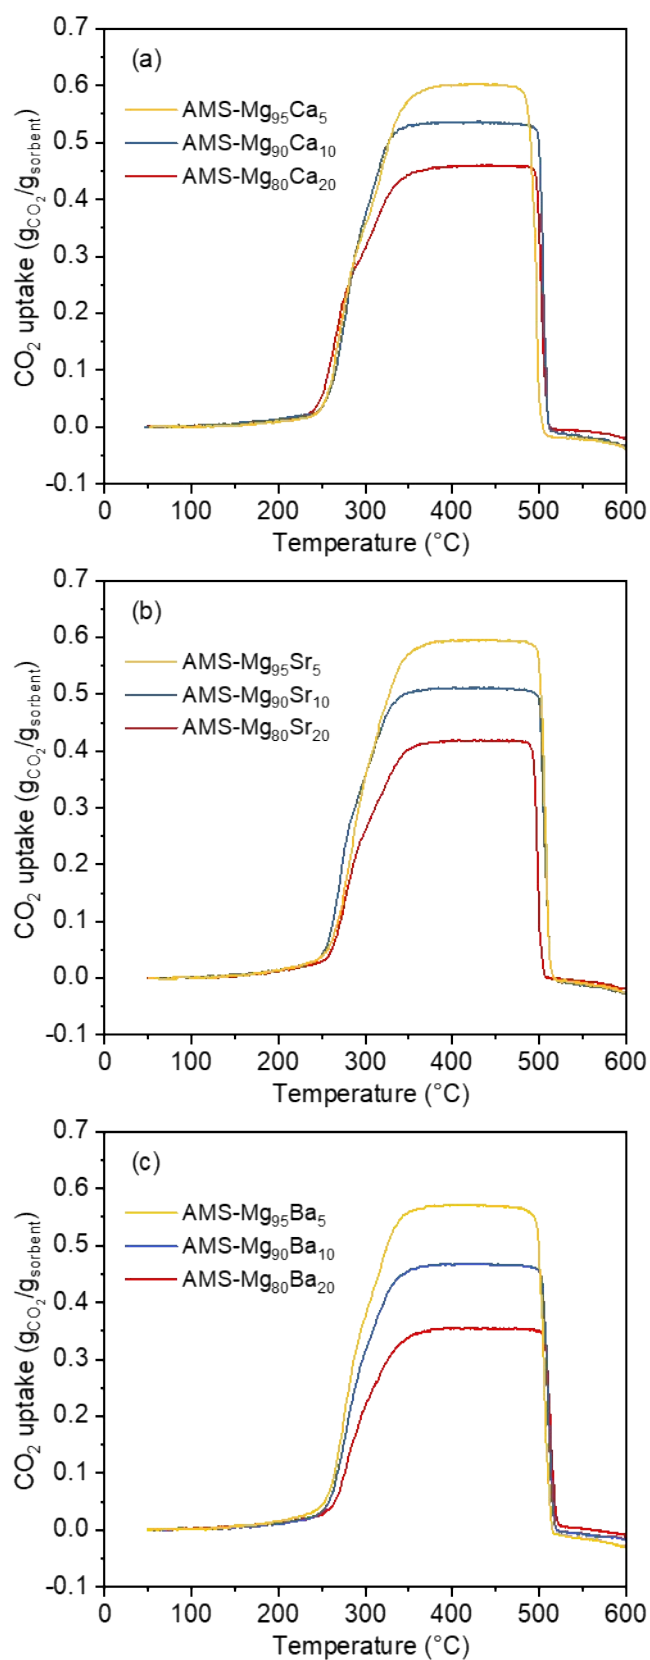

**Fig. S10** Dynamic thermograms of AMS-promoted MgO doped with (a) CaCO<sub>3</sub>, (b) SrCO<sub>3</sub> and (c) BaCO<sub>3</sub> (10 °C/min, in CO<sub>2</sub>)

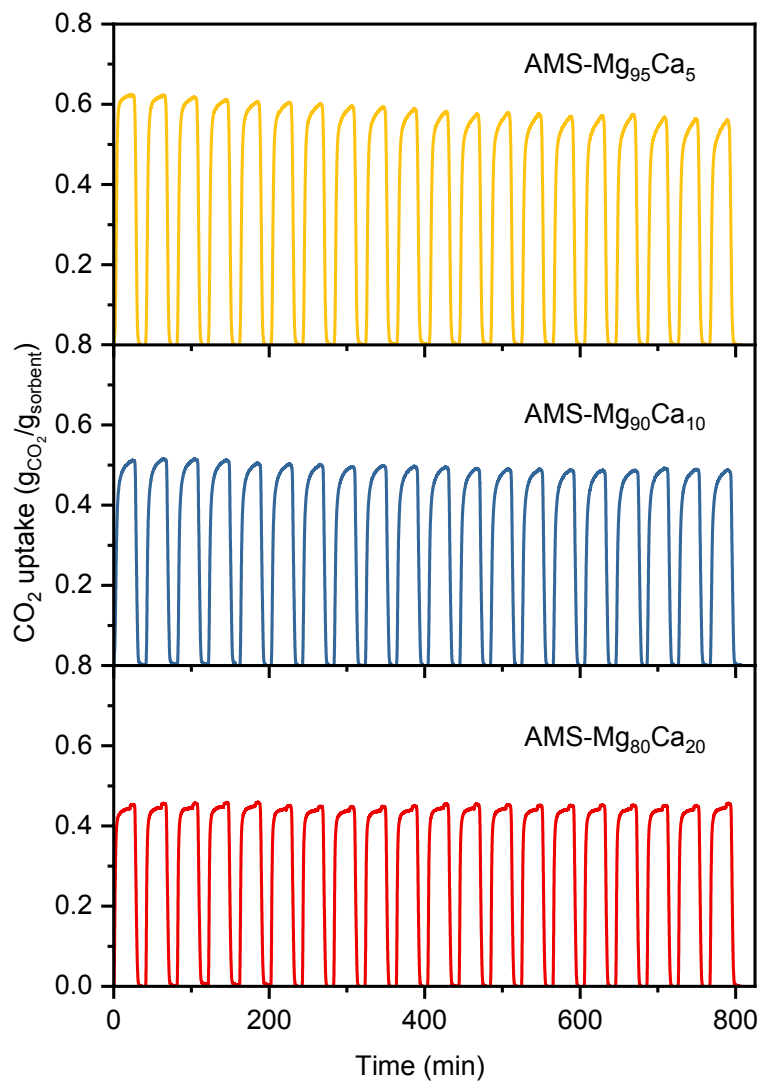

**Fig. S11** CO<sub>2</sub> uptake profiles of AMS-promoted CaCO<sub>3</sub>-doped MgO sorbents in 20 cycles (sorption: 350 °C for 20 min in CO<sub>2</sub>; regeneration: 400 °C for 10 min in N<sub>2</sub>; heating/cooling rate: 10 °C/min).

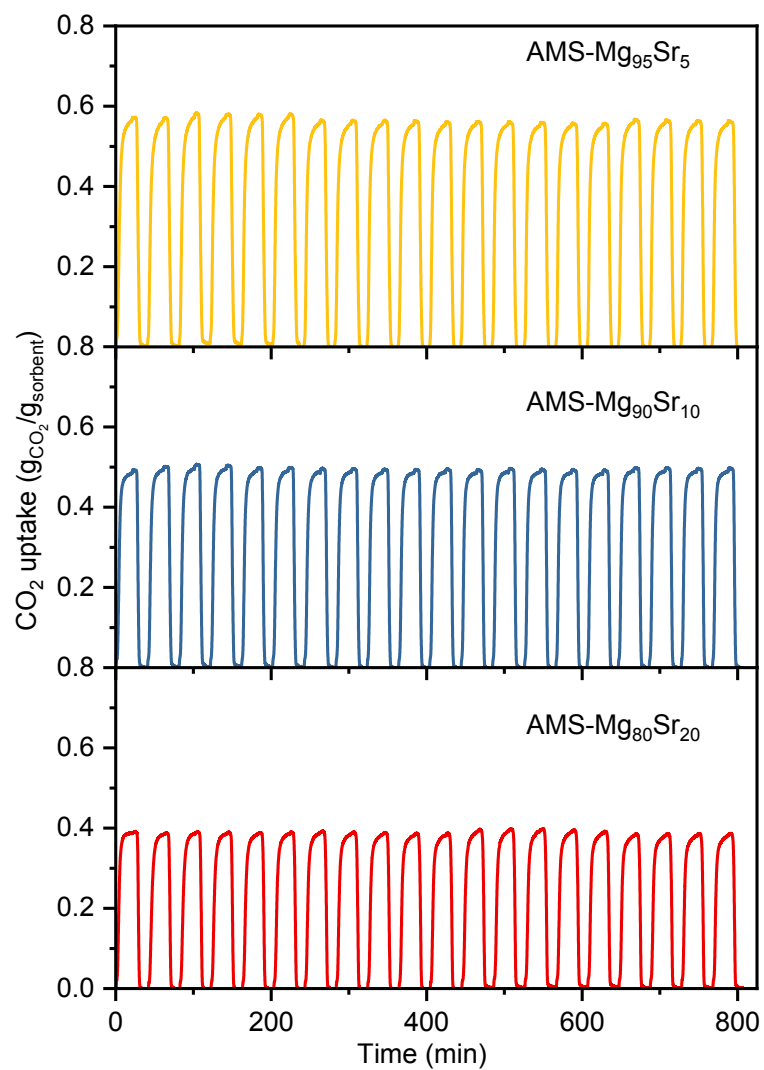

**Fig. S12** CO<sub>2</sub> uptake profiles of AMS-promoted SrCO<sub>3</sub>-doped MgO sorbents in 20 cycles (sorption: 350 °C for 20 min in CO<sub>2</sub>; regeneration: 400 °C for 10 min in N<sub>2</sub>; heating/cooling rate: 10 °C/min).

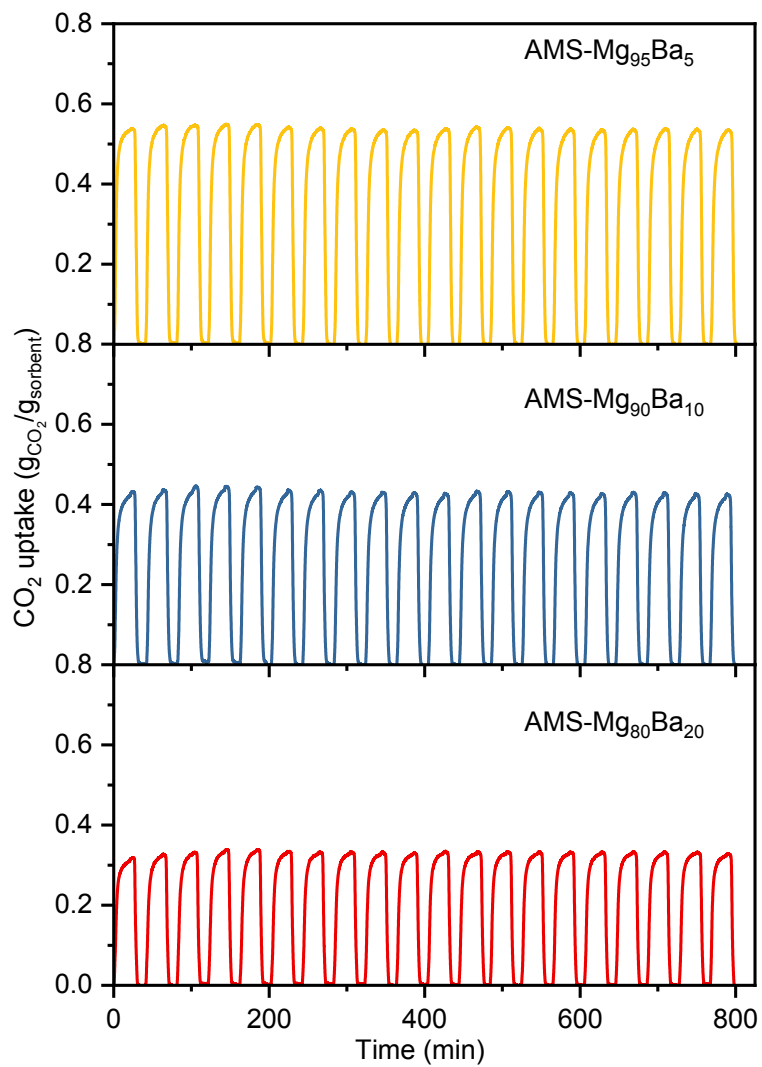

**Fig. S13** CO<sub>2</sub> uptake profiles of AMS-promoted BaCO<sub>3</sub>-doped MgO sorbents in 20 cycles (sorption: 350 °C for 20 min in CO<sub>2</sub>; regeneration: 400 °C for 10 min in N<sub>2</sub>; heating/cooling rate: 10 °C/min).

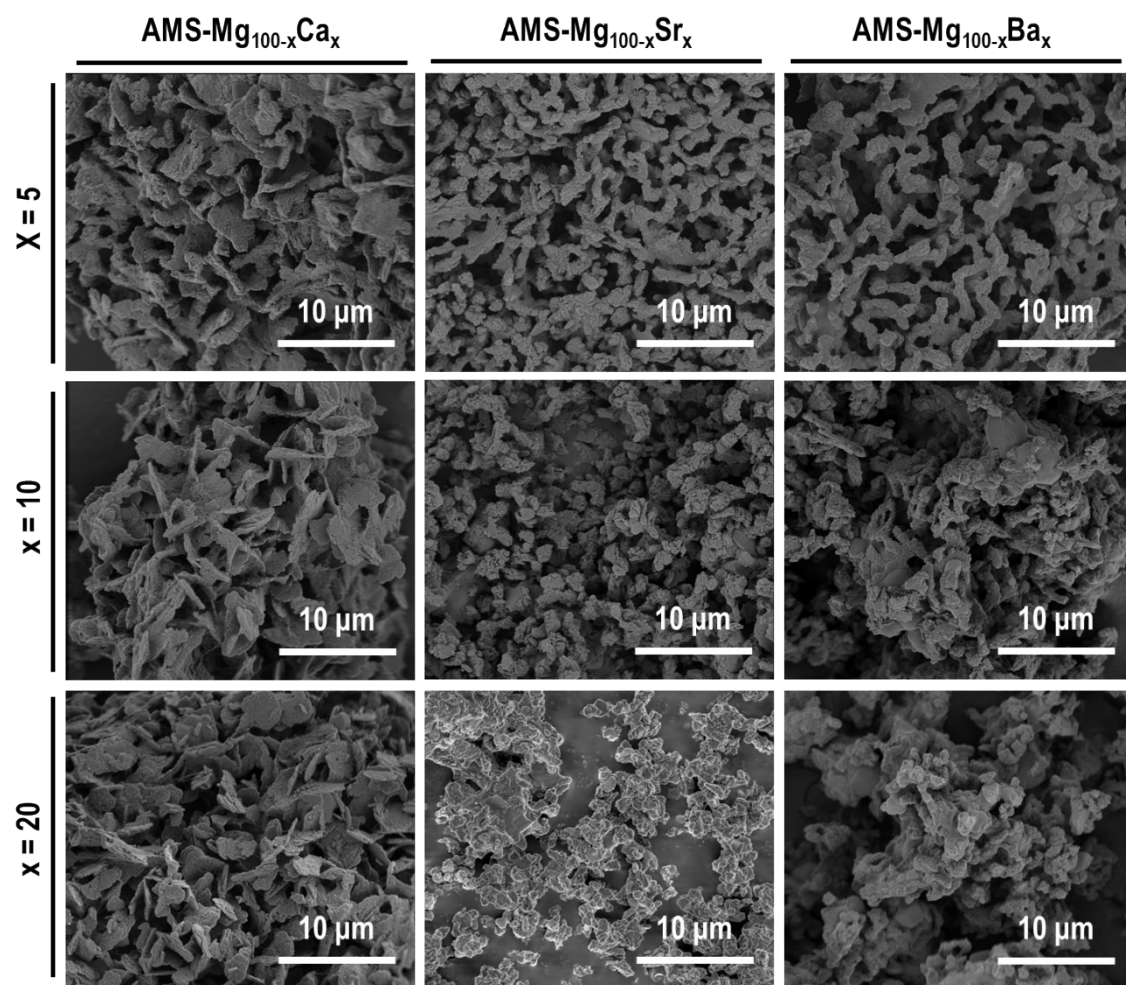

**Fig. S14** FESEM images of 20 cycle-used AMS-promoted  $\text{AcCO}_3$ -doped MgO sorbents.



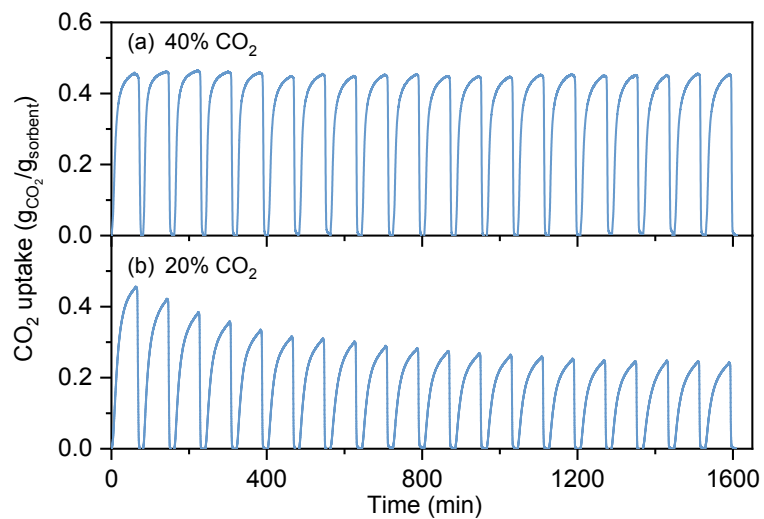

**Fig. S15** CO<sub>2</sub> uptake profiles of AMS-Mg<sub>90</sub>Ca<sub>10</sub> in 20 cycles (sorption: 300 °C for 60 min in (a) 20% CO<sub>2</sub> or (b) 40% CO<sub>2</sub>; regeneration: 400 °C for 10 min in N<sub>2</sub>; heating/cooling rate: 20 °C/min).
